# Supplementary material for: Comparison of transflection and transmission FTIR imaging measurements performed on differentially fixed tissue sections
Source: Royal Society of Chemistry journal article supplement (doi:10.1039/c4an02034k), 2015-01-01

## Comparison of transfection and transmission FTIR-microscopy measurements performed on differentially fixed tissue sections

David Perez-Guaita<sup>a,b</sup>, Phil Herauld<sup>b</sup>, Katarzyna M. Marzec<sup>b,c</sup>, Miguel de la Guardia<sup>b</sup>, Matti Kiupel<sup>d</sup>, Bayden R. Wood<sup>a\*</sup>

<sup>a</sup>Centre for Biospectroscopy, School of Chemistry, Monash University, Clayton, 3800 VIC., Australia.

<sup>b</sup>Analytical Chemistry Department, University of Valencia, Edifici Jeroni Muñoz, 46100 Burjassot, Spain

<sup>c</sup>Jagiellonian Centre for Experimental Therapeutics, Jagiellonian University, 30348 Krakow, Poland

<sup>d</sup>Diagnostic Center for Population and Animal Health, 48910-8107 Lansing (MI), USA

\*Corresponding author: [bayden.wood@monash.edu](mailto:bayden.wood@monash.edu)

### SUPPLEMENTARY MATERIAL

**SM1:** Individual HCA performed on the transfection and transmission images obtained for tissue #1. Images are coloured according to the classes indicated by the cluster. Left image correspond to transmission and right image to transfection. The spectra correspond to the mean spectrum of each class, corresponding the solid and light lines to the transmission and transfection respectively:

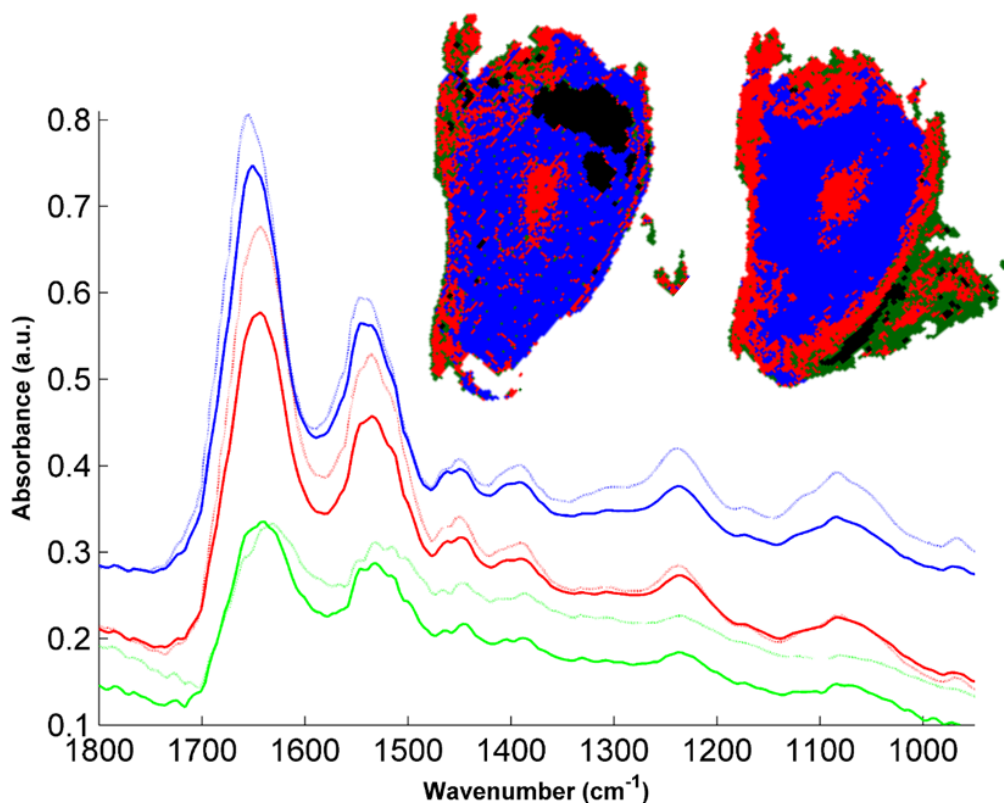

**SM2:** Individual HCA performed on the transfection and transmission images obtained for tissue #2. Images are coloured according to the classes indicated by the cluster. Left image correspond to transmission and right image to transfection. The spectra correspond to the mean spectrum of each class, corresponding the solid and light lines to the transmission and transfection respectively:

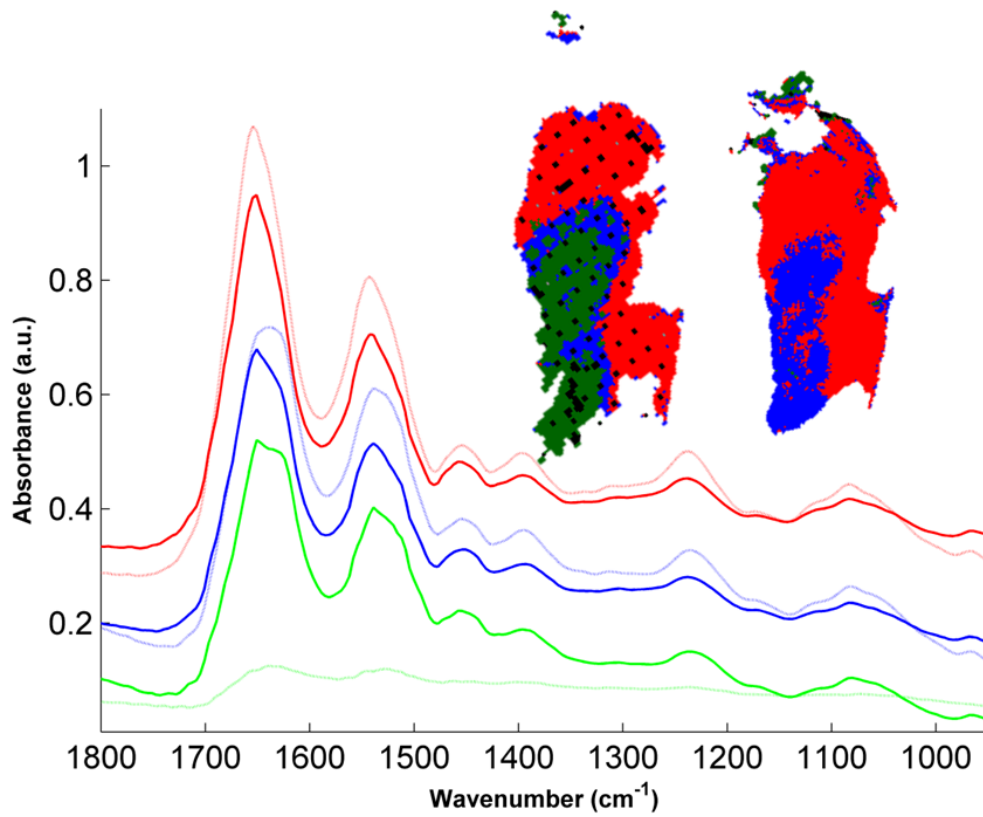

**SM3: Full resolution image of the tissue #1:**

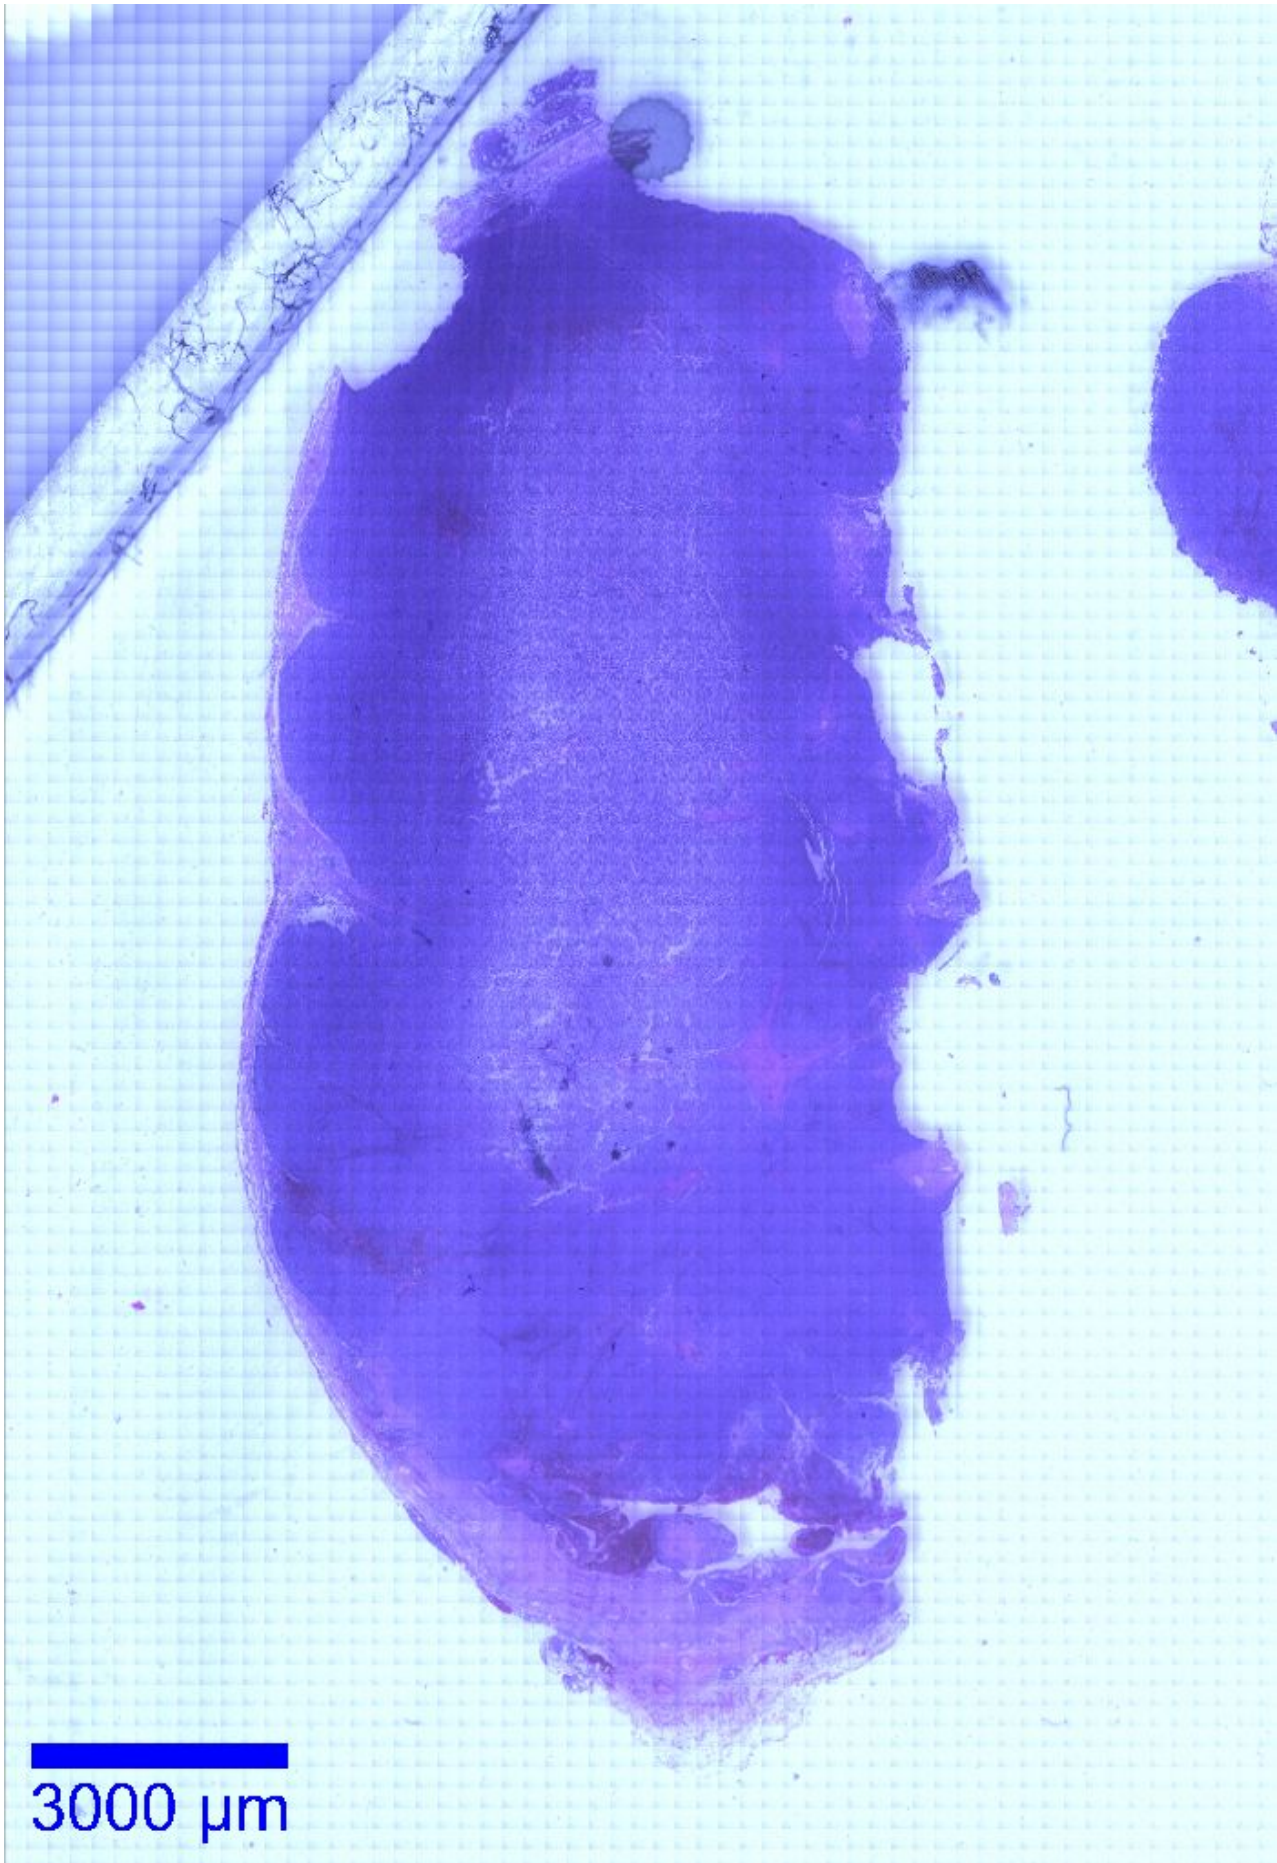

**SM4:** Baseline (dotted blue line) used on figure 3b and before the principal component analysis. Pink points represents the data used to fit the straight line.

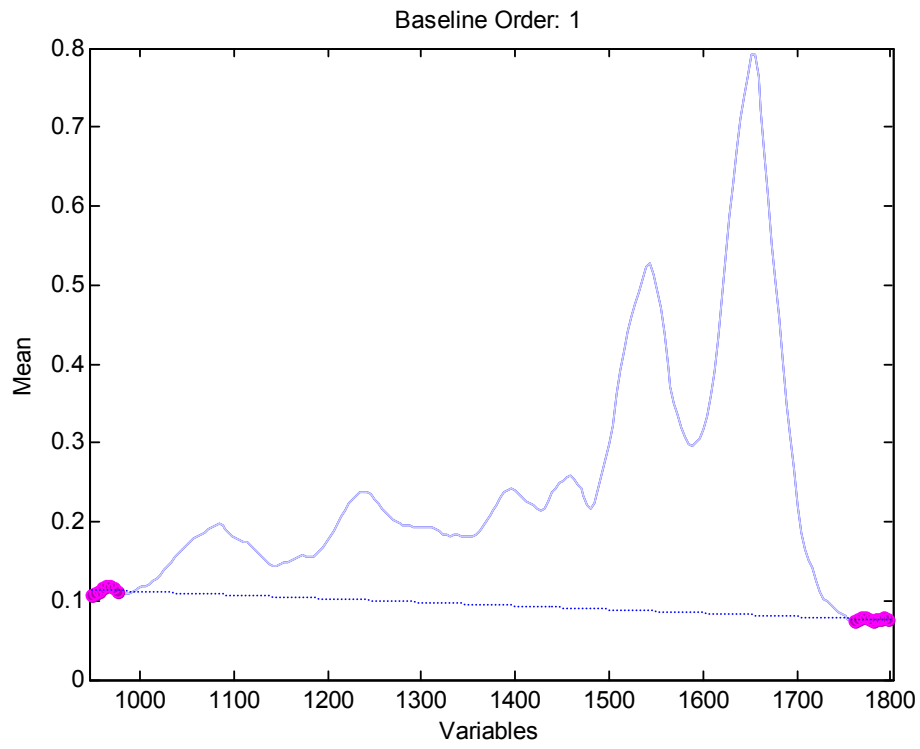

SM5: Full PCAs corresponding to figure 4

NOT NORMALIZED

#1

#2

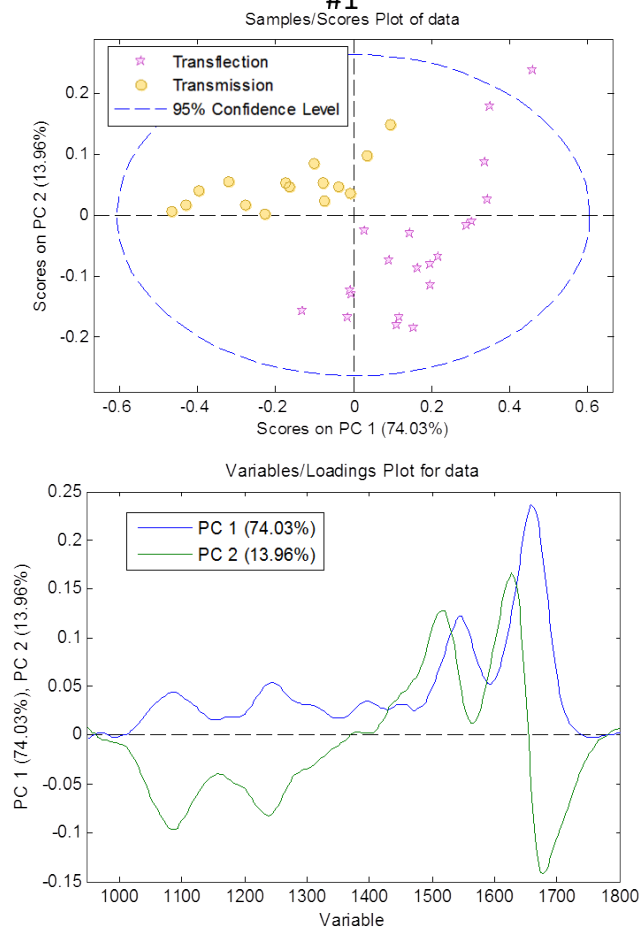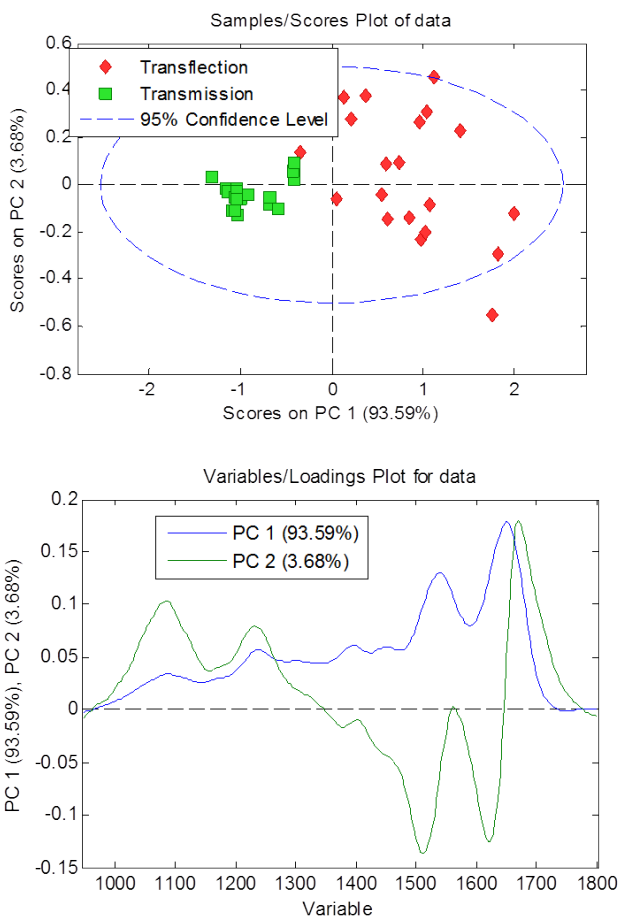

SM6: Full PCAs corresponding to figure 5

NORMALIZED

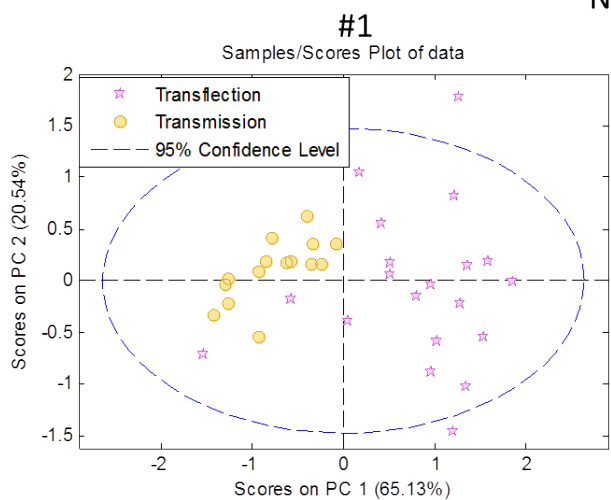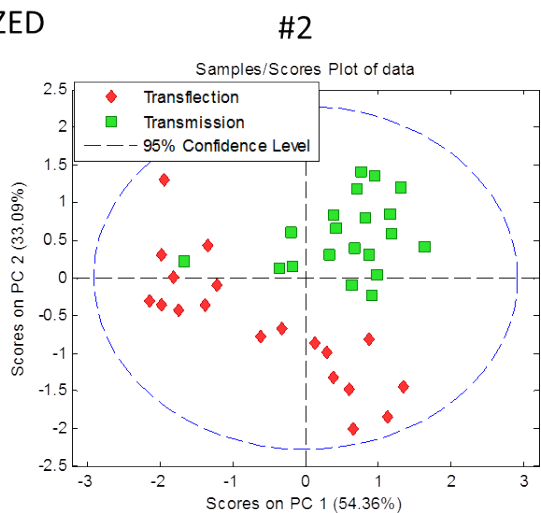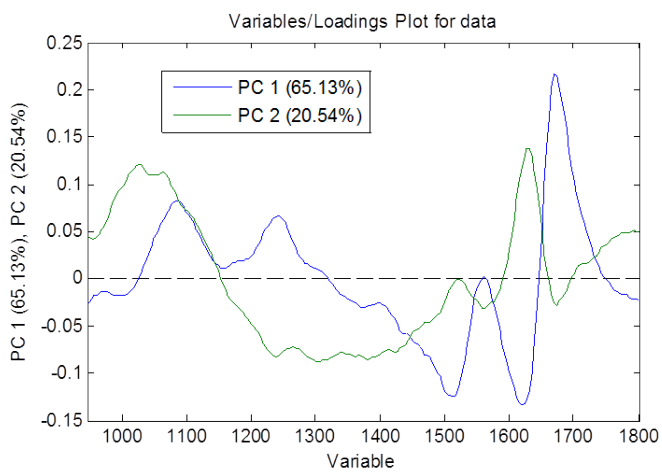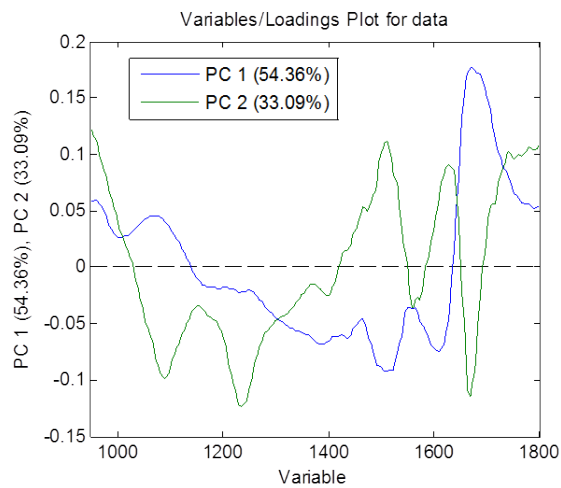

Supplement: c4an02034k1.pdf [file c4an02034k1.pdf]
